# Supplementary material for: Biological Control of Escherichia coli O157:H7 in Dairy Manure-Based Compost Using Competitive Exclusion Microorganisms
Source: MDPI journal article supplement (doi:10.3390/pathogens13050361), 2024-04-27
Supplement: s1 [file s1]

**Table S1.** Growth inhibitory activity of ten potential competitive exclusion microorganisms against *E. coli* O157:H7 in nutrient broth and compost under laboratory conditions

| Isolate identification based on<br>16S rRNA                         | <i>E. coli</i> O157:H7 log reduction/ml or g |                                           |
|---------------------------------------------------------------------|----------------------------------------------|-------------------------------------------|
|                                                                     | Liquid (TYP)                                 | Compost (stored in laboratory conditions) |
| <i>Comamonadaceae</i><br>(unclassified)                             | 2.45±0.15                                    | 2.14 ±0.25                                |
| <i>Enterobacteriaceae</i><br>(unclassified)                         | 1.63±0.47                                    | 1.06 ±0.33                                |
| <i>Comamonas</i> (genus)                                            | 1.38 ±0.26                                   | 1.44 ±0.28                                |
| <i>Kluyvera</i> (genus)                                             | 3.92 ±0.38                                   | 3.72 ±0.41                                |
| <i>Raoultella</i> (genus)                                           | 1.89 ±0.19                                   | 1.77 ±0.32                                |
| <i>Citrobacter</i> spp.                                             | 1.13 ±0.29                                   | 1.15 ±0.47                                |
| <i>Enterobacter</i> #1(genus)                                       | 1.75 ±0.34                                   | 1.44 ±0.35                                |
| <i>Comamonas testosteroni</i> CNB-2                                 | 1.75 ±0.17                                   | 0.89 ±0.05                                |
| <i>Nannocystaceae</i> (family)<br>uncultured <i>proteobacterium</i> | 1.97 ±0.28                                   | 2.36 ±0.44                                |
| <i>Enterobacter</i> #2(genus)                                       | 2.15 ±0.51                                   | 1.93 ±0.27                                |

**Table S2.** *E. coli* O157:H7 growth in compost with different moisture levels in the absence and presence of CE cultures at 22 and 30°C

| Tem<br>p<br>(°C) | Moistur<br>e<br>(%) | CE  | log CFU <i>E. coli</i> O157/g on days of incubation |                               |                               |                               |
|------------------|---------------------|-----|-----------------------------------------------------|-------------------------------|-------------------------------|-------------------------------|
|                  |                     |     | 0                                                   | 1                             | 2                             | 3                             |
| 22               | 20                  | C   | <b>A</b> 2.30 ± 0.00 <b>a</b> **                    | <b>B</b> 4.69 ± 0.01 <b>a</b> | <b>B</b> 4.52 ± 0.00 <b>a</b> | <b>B</b> 5.00 ± 0.10 <b>a</b> |
|                  |                     | Trt | <b>A</b> 2.30 ± 0.00 <b>a</b>                       | <b>A</b> 3.64 ± 0.09 <b>a</b> | <b>A</b> 3.55 ± 0.17 <b>a</b> | <b>A</b> 3.95 ± 0.19 <b>a</b> |
|                  | 30                  | C   | <b>A</b> 2.30 ± 0.00 <b>a</b>                       | <b>B</b> 7.13 ± 0.17 <b>c</b> | <b>B</b> 8.43 ± 0.04 <b>b</b> | <b>B</b> 8.46 ± 0.03 <b>b</b> |
|                  |                     | Trt | <b>A</b> 2.30 ± 0.00 <b>a</b>                       | <b>A</b> 5.40 ± 0.04 <b>b</b> | <b>A</b> 5.73 ± 0.11 <b>c</b> | <b>A</b> 5.87 ± 0.09 <b>c</b> |
|                  | 40                  | C   | <b>A</b> 2.30 ± 0.00 <b>a</b>                       | <b>B</b> 6.67 ± 0.17 <b>b</b> | <b>B</b> 8.52 ± 0.00 <b>b</b> | <b>B</b> 8.50 ± 0.07 <b>b</b> |
|                  |                     | Trt | <b>A</b> 2.30 ± 0.00 <b>a</b>                       | <b>A</b> 5.46 ± 0.07 <b>b</b> | <b>A</b> 5.15 ± 0.11 <b>b</b> | <b>A</b> 5.14 ± 0.14 <b>b</b> |
| 30               | 20                  | C   | <b>A</b> 2.30 ± 0.00 <b>a</b>                       | <b>B</b> 5.98 ± 0.09 <b>a</b> | <b>B</b> 6.84 ± 0.02 <b>a</b> | <b>B</b> 6.54 ± 0.10 <b>a</b> |
|                  |                     | Trt | <b>A</b> 2.30 ± 0.00 <b>a</b>                       | <b>A</b> 4.42 ± 0.19 <b>a</b> | <b>A</b> 4.50 ± 0.02 <b>a</b> | <b>A</b> 4.42 ± 0.06 <b>a</b> |
|                  | 30                  | C   | <b>A</b> 2.30 ± 0.00 <b>a</b>                       | <b>B</b> 8.28 ± 0.09 <b>b</b> | <b>B</b> 8.43 ± 0.03 <b>b</b> | <b>B</b> 8.50 ± 0.09 <b>b</b> |
|                  |                     | Trt | <b>A</b> 2.30 ± 0.00 <b>a</b>                       | <b>A</b> 5.90 ± 0.07 <b>b</b> | <b>A</b> 5.90 ± 0.12 <b>b</b> | <b>A</b> 6.25 ± 0.11 <b>c</b> |
|                  | 40                  | C   | <b>A</b> 2.30 ± 0.00 <b>a</b>                       | <b>B</b> 8.72 ± 0.24 <b>c</b> | <b>B</b> 8.52 ± 0.00 <b>b</b> | <b>B</b> 8.48 ± 0.05 <b>b</b> |
|                  |                     | Trt | <b>A</b> 2.30 ± 0.00 <b>a</b>                       | <b>A</b> 6.29 ± 0.18 <b>c</b> | <b>A</b> 6.17 ± 0.03 <b>b</b> | <b>A</b> 5.91 ± 0.04 <b>b</b> |

\*Means with different uppercase letter in a column at the same temperature and moisture content are significantly different ( $P < 0.05$ ).

\*\*Means with different lowercase letter in a column at the same temperature and same treatment are significantly different ( $P < 0.05$ ).
